# Supplementary material for: Yoga Prevents Gray Matter Atrophy in Women at Risk for Alzheimer’s Disease: A Randomized Controlled Trial
Source: PubMed Central journal article supplement — J Alzheimers Dis. 2022 May 17;87(2):569–81. doi: 10.3233/JAD-215563 (PMC9198760; doi:10.3233/jad-215563), 2022-05-17
Supplement: jad-87-jad215563-s001.pdf [file jad-87-jad215563-s001.pdf]

# Supplementary Material

## Yoga Prevents Gray Matter Atrophy in Women at Risk for Alzheimer’s Disease: A Randomized Controlled Trial

**Supplementary Table 1.** Participant demographics, clinical, and memory scores at baseline (means and standard deviations)

| Variable                                | Yoga    |                    | Memory training |                    | Kruskal-Wallis test<br>Statistic<br>(p) |
|-----------------------------------------|---------|--------------------|-----------------|--------------------|-----------------------------------------|
|                                         | Mean    | Standard deviation | Mean            | Standard deviation |                                         |
| <b>Demographics and clinical scores</b> |         |                    |                 |                    |                                         |
| Age                                     | 60.9    | 6.66               | 64.0            | 6.48               | 1.26 (0.26)                             |
| Education                               | 15.7    | 2.06               | 16.1            | 1.66               | 0.12 (0.73)                             |
| Body mass index                         | 27.61   | 7.29               | 25.91           | 7.18               | 0.16 (0.69)                             |
| Anxiety                                 | 5.3     | 2.79               | 5.2             | 3.97               | 0.41 (0.52)                             |
| Depression                              | 8.2     | 5.33               | 8.2             | 5.9                | <0.0001 (1.0)                           |
| Resilience                              | 72.3    | 13.71              | 72.9            | 16.2               | <0.0001 (1.0)                           |
| Perceived Stress                        | 22.7    | 2.95               | 21.8            | 3.58               | 0.1 (0.75)                              |
| <b>Memory Function Questionnaire</b>    |         |                    |                 |                    |                                         |
| Frequency of Forgetting                 | 4.12    | 1.21               | 4.7             | 1.02               | 1.48 (0.22)                             |
| Seriousness of Forgetting               | 3.84    | 1.31               | 4.33            | 1.23               | 1.11 (0.29)                             |
| <b>Gray matter volume</b>               |         |                    |                 |                    |                                         |
| Estimated total intracranial volume     | 61.54   | 6.58               | 64.55           | 6.41               | 0.13 (0.72)                             |
| Left hippocampus                        | 3623.2  | 453.22             | 3580.97         | 291.93             | 0.03 (0.87)                             |
| Right hippocampus                       | 3769.31 | 427.23             | 3658.77         | 326.94             | 0.31 (0.58)                             |
| Left amygdala                           | 1256.45 | 138.62             | 1297.16         | 94.53              | 0.79 (0.38)                             |
| Right amygdala                          | 1480.94 | 132.44             | 1469.11         | 151.12             | 0.05 (0.82)                             |

Neither demographics and clinical, nor region of interest-based gray matter volume differed between the groups at baseline (p-values in parentheses).

**Supplementary Table 2.** Within-group differences in gray matter volume change (means and standard deviations)

| Variable                   | Yoga                                   |                                      | Memory training                        |                                   |
|----------------------------|----------------------------------------|--------------------------------------|----------------------------------------|-----------------------------------|
|                            | Mean change<br>(standard<br>deviation) | Signed rank<br>test statistic<br>(p) | Mean change<br>(standard<br>deviation) | Signed rank test<br>statistic (p) |
| <b>Clusters</b>            |                                        |                                      |                                        |                                   |
| Left middle temporal       | 0.72 (2.8)                             | 3.0 (0.83)                           | -7.51 (6.87)                           | -29.0 (0.007**)                   |
| Left supramarginal         | -0.25 (2.43)                           | -6.0 (0.64)                          | -7.15 (6.06)                           | -30.0 (0.005**)                   |
| Left precentral            | 2.45 (4.53)                            | 23.0 (0.04*)                         | -6.06 (6.07)                           | -26.0 (0.02*)                     |
| Left superior frontal      | 0.79 (2.81)                            | 7.0 (0.58)                           | -5.12 (6.28)                           | -26.0 (0.02*)                     |
| Left lateral occipital     | 3.84 (3.83)                            | 28.0 (0.01*)                         | -6.56 (6.59)                           | -30.0 (0.005**)                   |
| Right postcentral          | 1.48 (4.38)                            | 10.0 (0.41)                          | -7.47 (9.81)                           | -28.0 (0.01*)                     |
| Right precuneus            | 2.99 (4.96)                            | 18.0 (0.12)                          | -5.11 (5.9)                            | -25.0 (0.02*)                     |
| Right precentral           | 1.7 (4.49)                             | 15.0 (0.21)                          | -5.36 (5.62)                           | -29.0 (0.007**)                   |
| Right inferior parietal    | 2.16 (3.86)                            | 17.0 (0.15)                          | -5.28 (5.69)                           | -27.0 (0.01*)                     |
| Right superior temporal    | 0.9 (3.09)                             | 12.0 (0.32)                          | -6.0 (6.42)                            | -30.0 (0.005**)                   |
| Right paracentral          | 1.19 (4.26)                            | 8.0 (0.52)                           | -7.62 (7.61)                           | -28.0 (0.01*)                     |
| <b>Regions of Interest</b> |                                        |                                      |                                        |                                   |
| Left hippocampus           | 18.92 (69.19)                          | 11.0 (0.37)                          | -4.5 (40.22)                           | -8.0 (0.52)                       |
| Right hippocampus          | 27.61 (36.6)                           | 24.0 (0.03*)                         | -22.24 (54.6)                          | -15.0 (0.20)                      |
| Left amygdala              | -3.54 (45.69)                          | -6.0 (0.63)                          | 4.02 (34.97)                           | 12.0 (0.32)                       |
| Right amygdala             | 15.91 (48.43)                          | 9.0 (0.46)                           | 3.25 (67.38)                           | -2.0 (0.90)                       |

Cluster and region of interest changes in gray matter volume within the yoga and the memory enhancement training groups.

\*p<0.05; \*\*p<0.01
